# Supplementary material
Source: PubMed Central journal article supplement (PMC6177604)
Supplement: supp_RA118.003897_138039_2_supp_176157_pcm9jl.pdf [file supp_RA118.003897_138039_2_supp_176157_pcm9jl.pdf]

# Supporting Information

## **D-2-Hydroxyglutarate dehydrogenase plays a dual role in L-serine biosynthesis and D-malate utilization in the bacterium *Pseudomonas stutzeri***

**Xiaoting Guo<sup>1</sup>, Manman Zhang<sup>1</sup>, Menghao Cao<sup>1</sup>, Wen Zhang<sup>2</sup>, Zhaoqi Kang<sup>1</sup>, Ping Xu<sup>3</sup>, Cuiqing Ma<sup>1</sup>,  
and Chao Gao<sup>1\*</sup>**

<sup>1</sup>State Key Laboratory of Microbial Technology, Shandong University, Jinan 250100, People's Republic of China

<sup>2</sup>Institute of Medical Sciences, the Second Hospital of Shandong University, 247# Beiyuan Street, Jinan 250033, People's Republic of China

<sup>3</sup>State Key Laboratory of Microbial Metabolism, Joint International Research Laboratory of Metabolic & Developmental Sciences, and School of Life Sciences & Biotechnology, Shanghai Jiao Tong University, Shanghai 200240, People's Republic of China

Running title: Dual role of D-2-hydroxyglutarate dehydrogenase

\*To whom correspondence should be addressed: Prof. Chao Gao, State Key Laboratory of Microbial Technology, Shandong University, Jinan 250100, People's Republic of China.

Telephone: +86-531-88369463; FAX: +86-531-88369463; E-mail: jieerbu@sdu.edu.cn

**Keywords:** D-2-hydroxyglutarate, dehydrogenase, D-malate, serine, TCA cycle, enzyme kinetics, *Pseudomonas*, phosphoglycerate dehydrogenase, D-2-hydroxyglutarate dehydrogenase, oxaloacetate

### **Contents:**

Table S1. Strains and plasmids used in this study.

Table S2. Primers used in this study.

**TABLE S1.**

Strains and plasmids used in this study.

| Strain/plasmid                                                       | genotype or relevant characteristics                                                                                                                                                                                                                  |
|----------------------------------------------------------------------|-------------------------------------------------------------------------------------------------------------------------------------------------------------------------------------------------------------------------------------------------------|
| <b>Strain</b>                                                        |                                                                                                                                                                                                                                                       |
| <i>E. coli</i> DH5 $\alpha$                                          | F <sup>-</sup> , $\phi$ 80 <i>lacZ</i> $\Delta$ M15, $\Delta$ ( <i>lacZYA-argF</i> ) U169, <i>recA1</i> , <i>endA1</i> , <i>hsdR17</i> , <i>phoA</i> , <i>supE44</i> $\lambda$ <sup>-</sup> , <i>thi</i> <sup>-1</sup> , <i>gyrA96</i> , <i>relA1</i> |
| <i>E. coli</i> BL21 (DE3)                                            | F <sup>-</sup> <i>ompT gal dcm lon hsdS<sub>B</sub></i> (rB <sup>-</sup> mB <sup>-</sup> ) $\lambda$ (DE3), used for protein expression                                                                                                               |
| <i>P. stutzeri</i> A1501-WT                                          | wild strain of <i>P. stutzeri</i> A1501                                                                                                                                                                                                               |
| <i>P. stutzeri</i> A1501-pk18- <i>d2hgdh'</i>                        | <i>P. stutzeri</i> A1501 strain harboring chromosomal integration with pk18- <i>d2hgdh'</i> plasmid; Km <sup>r</sup> *                                                                                                                                |
| <i>P. stutzeri</i> A1501-pk18- <i>etf'</i>                           | <i>P. stutzeri</i> A1501 strain harboring chromosomal integration with pk18- <i>etf'</i> plasmid; Km <sup>r</sup> *                                                                                                                                   |
| <i>P. stutzeri</i> A1501- $\Delta$ <i>d2hgdh</i>                     | <i>P. stutzeri</i> A1501 strain mutant obtained by exchanging the <i>d2hgdh</i> gene with the <i>d2hgdh'</i>                                                                                                                                          |
| <i>P. stutzeri</i> A1501- $\Delta$ <i>etf</i>                        | <i>P. stutzeri</i> A1501 strain mutant obtained by exchanging the <i>etf</i> gene with the <i>etf'</i>                                                                                                                                                |
| <i>P. stutzeri</i> A1501- $\Delta$ <i>d2hgdh-d2hgdh</i> <sup>+</sup> | A1501- $\Delta$ <i>d2hgdh</i> strain harboring the plasmid pBBR1MCS-5- <i>d2hgdh</i> ; Gm <sup>r</sup> *                                                                                                                                              |
| <i>P. stutzeri</i> A1501- $\Delta$ <i>etf-etf</i> <sup>+</sup>       | A1501- $\Delta$ <i>etf</i> strain harboring the plasmid pBBR1MCS-5- <i>etf</i> ; Gm <sup>r</sup> *                                                                                                                                                    |
| <i>P. stutzeri</i> A1501- $\Delta$ <i>d2hgdh-dmlA</i> <sup>+</sup>   | A1501- $\Delta$ <i>d2hgdh</i> strain harboring the plasmid pBBR1MCS-5- <i>dmlA</i> ; Gm <sup>r</sup> *                                                                                                                                                |
| <i>P. stutzeri</i> A1501-pME6522- <i>P<sub>d2hgdh</sub></i>          | <i>P. stutzeri</i> A1501 strain harboring the transcriptional fusions plasmid pME6522- <i>P<sub>d2hgdh</sub></i>                                                                                                                                      |
| BL-D2HGDH                                                            | <i>E. coli</i> BL21(DE3) strain harboring the expression plasmid pET- <i>d2hgdh</i>                                                                                                                                                                   |
| BL-ETF                                                               | <i>E. coli</i> BL21(DE3) strain harboring the expression plasmid pET- <i>etfAB</i>                                                                                                                                                                    |
| BL-SerA                                                              | <i>E. coli</i> BL21(DE3) strain harboring the expression plasmid PET- <i>serA</i>                                                                                                                                                                     |
| BL-DmlA                                                              | <i>E. coli</i> BL21(DE3) strain harboring the expression plasmid PET- <i>dmlA</i>                                                                                                                                                                     |
| <i>E. coli</i> K-12 MG1655-WT                                        | wild strain of <i>E. coli</i> MG1655                                                                                                                                                                                                                  |
| <i>E. coli</i> K-12 MG1655- $\Delta$ <i>dmlA</i>                     | <i>E. coli</i> MG1655 strain mutant obtained by exchanging the <i>dmlA</i> gene with the <i>Kana</i>                                                                                                                                                  |
| <i>E. coli</i> K-12 MG1655- $\Delta$ <i>dmlA-dmlA</i> <sup>+</sup>   | MG1655- $\Delta$ <i>dmlA</i> strain harboring the plasmid pMMB66EH- <i>dmlA</i> ; Ap <sup>r</sup> *                                                                                                                                                   |
| <i>E. coli</i> K-12 MG1655- $\Delta$ <i>dmlA-d2hgdh</i> <sup>+</sup> | MG1655- $\Delta$ <i>dmlA</i> strain harboring the plasmid pMMB66EH- <i>d2hgdh</i> ; Ap <sup>r</sup> *                                                                                                                                                 |
| <b>Plasmid</b>                                                       |                                                                                                                                                                                                                                                       |
| pk18 <i>mobsacB</i>                                                  | Allelic exchange suicide vector mobilized by <i>E. coli</i> S17-1 $\lambda$ <i>pir</i> ; for selecting double crossover; Km <sup>r</sup> Suc <sup>s</sup> *                                                                                           |
| pk18- <i>d2hgdh'</i>                                                 | pk18 <i>mobsacB</i> carrying <i>d2hgdh'</i>                                                                                                                                                                                                           |
| pk18- <i>etf'</i>                                                    | pk18 <i>mobsacB</i> carrying <i>etfAB'</i>                                                                                                                                                                                                            |
| pET28a(+)                                                            | vector for protein expression, Km <sup>r</sup> *                                                                                                                                                                                                      |

---

|                                            |                                                                                                                                    |
|--------------------------------------------|------------------------------------------------------------------------------------------------------------------------------------|
| pET- <i>dmlA</i>                           | pET28a(+) carrying <i>dmlA</i> gene                                                                                                |
| pBBR1MCS-5                                 | broad host range cloning vector; Gm <sup>r</sup> *                                                                                 |
| pBBR- <i>dmlA</i>                          | pBBR1MCS-5 carrying <i>dmlA</i> gene                                                                                               |
| pMMB66EH                                   | broad host range <i>tacP</i> expression vector; <i>lacI</i> <sup>q</sup> ; Ap <sup>r</sup> *                                       |
| pMM- <i>d2hgdh</i>                         | pMMB66EH carrying <i>d2hgdh</i> gene                                                                                               |
| pMM- <i>dmlA</i>                           | pMMB66EH carrying <i>dmlA</i> gene                                                                                                 |
| pME6522                                    | <i>E. coli</i> - <i>Pseudomonas</i> shuttle vector for transcriptional <i>lacZ</i> fusions and promoter probing, Tc <sup>r</sup> * |
| pME6522- <i>P</i> <sub><i>d2hgdh</i></sub> | A 199 bp fragment upstream translation initiation site of <i>d2hgdh</i> was ligated into the pME6522                               |

---

\*Km<sup>r</sup>, Gm<sup>r</sup>, Tc<sup>r</sup> and Ap<sup>r</sup> indicate resistance to kanamycin, gentamicin sulphate, tetracycline and ampicillin, respectively. Suc<sup>s</sup> indicates sensitive to sucrose.

**TABLE S2.**

Primers used in this study.

| Primer | Sequence                                   |
|--------|--------------------------------------------|
| PD1    | 5'- TATCCATGGGCATGATGAAAACGATGCGT - 3' †   |
| PD2    | 5'- GACGGATCCACGCAAATAATTTTGCAAATCG - 3' † |
| PBA1   | 5'- AATTGGATCCATGATGAAAACGATGCG - 3' †     |
| PBA2   | 5'- AATTAAGCTTTTAACGCAAATAATTT - 3' †      |
| PMD1   | 5'- AATTGGATCCATGACCGACCCCGCCCTGA - 3' †   |
| PMD2   | 5'- AATTAAGCTTTCAGGCCGCGAAGATCTTGC - 3' †  |
| PMA1   | 5'- AATTGGATCCATGATGAAAACGATGCG - 3' †     |
| PMA2   | 5'- AAGGAAGCTTTTAACGCAAATAATTT - 3' †      |
| 6522D1 | 5'- AATTGAATTCCTGCATTAACCTTAAGGCC - 3' †   |
| 6522D2 | 5'- AATTCTGCAGCACGGAACTTCATACGAT - 3' †    |

† *Nco*I, *Bam*HI, *Hind*III, *Eco*RI, and *Pst*I restriction sites introduced in the primers are underlined.
